# Supplementary material for: Synthesis of a highly efficient phosphorus-containing flame retardant utilizing plant-derived diphenolic acids and its application in polylactic acid
Source: Royal Society of Chemistry journal article supplement (doi:10.1039/c6ra06742e), 2016-01-01
Supplement: c6ra06742e1.pdf [file c6ra06742e1.pdf]

# Synthesis of a highly efficient phosphorous-containing flame retardant utilizing plant-derived diphenolic acids and its application in polylactic acid

Jian Jing,<sup>ab</sup> Yan Zhang,<sup>b</sup> Xinlei Tang,<sup>ab</sup> Zhengping Fang.<sup>ab\*</sup>

<sup>a</sup>MOE Key Laboratory of Macromolecular Synthesis and Functionalization, Institute of Polymer Composites, Zhejiang University, Hangzhou 310027, China

<sup>b</sup>Laboratory of Polymer Materials and Engineering, Ningbo Institute of Technology, Zhejiang University, Ningbo 315100, China

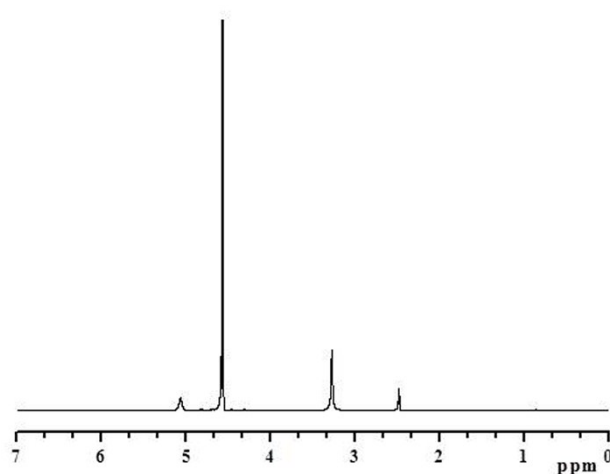

Fig. S1 <sup>1</sup>H NMR spectrum of PEPA

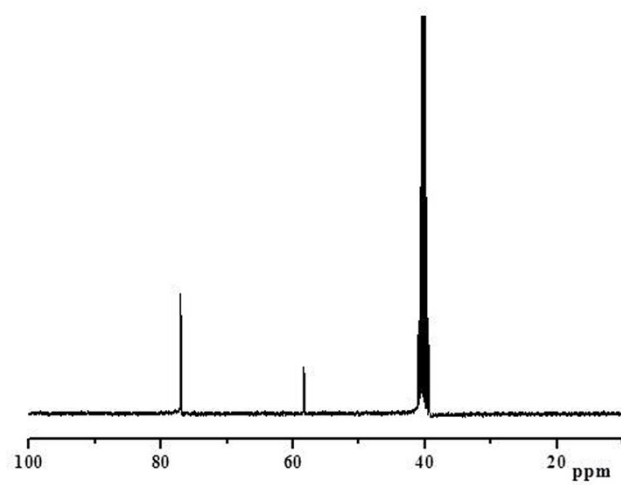

Fig. S2  $^{13}\text{C}$  NMR spectrum of PEPA

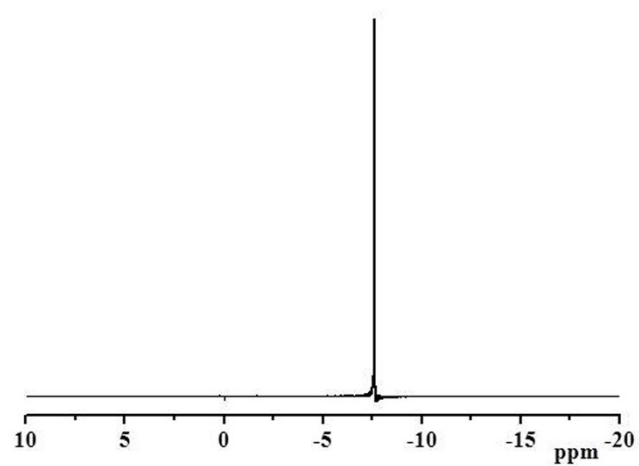

Fig. S3  $^{31}\text{P}$  NMR spectrum of DPM

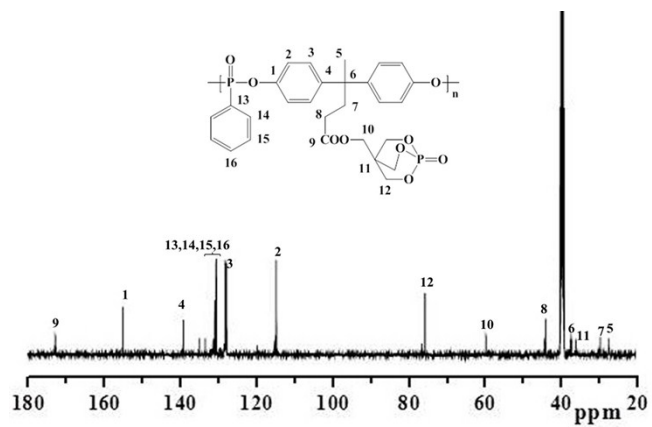

Fig. S4  $^{13}\text{C}$  NMR spectrum of BPPT
